# Supplementary material for: Association between insulin resistance and sustained virologic response in hepatitis C treatment, genotypes 1 versus 2 and 3: systematic literature review and meta-analysis
Source: PubMed Central journal article supplement — Braz J Infect Dis. 2013 Sep 19;17(5):555–63. doi: 10.1016/j.bjid.2013.02.009 (PMC9425142; doi:10.1016/j.bjid.2013.02.009), 2013-09-19
Supplement: mmc1.pdf [file mmc1.pdf]

SUPPLEMENTARY DATA

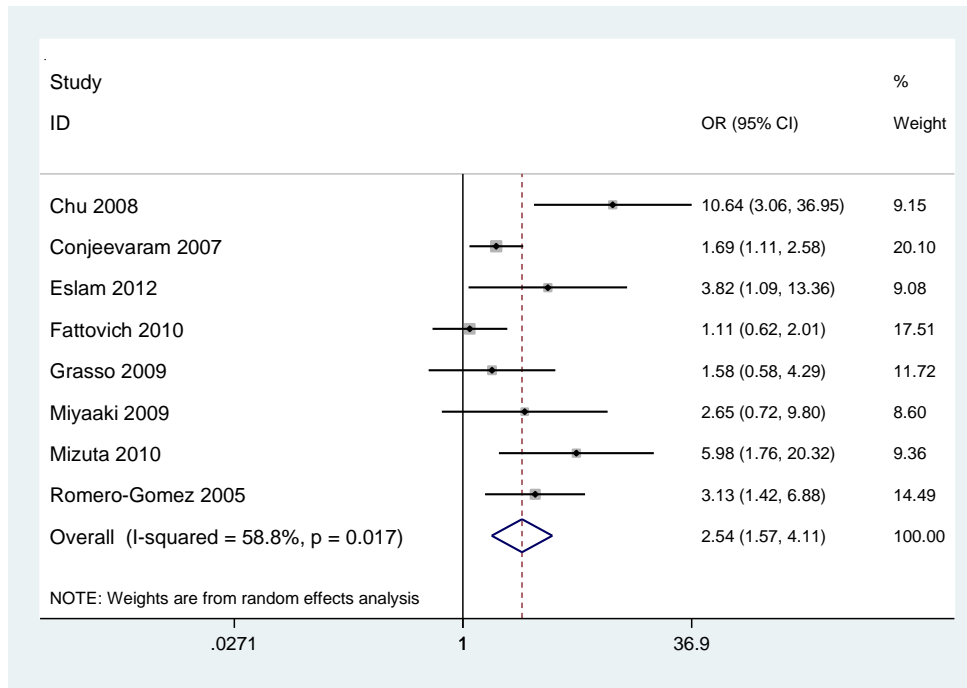

Heterogeneity  $Q=17.01$ (d.f.=7)  $p=0.017$ ;  $I^2=58.8\%$ ;  $t^2=0.25$ ; Test of  $OR=1$ :  $p=0.000$

FIGURE 6

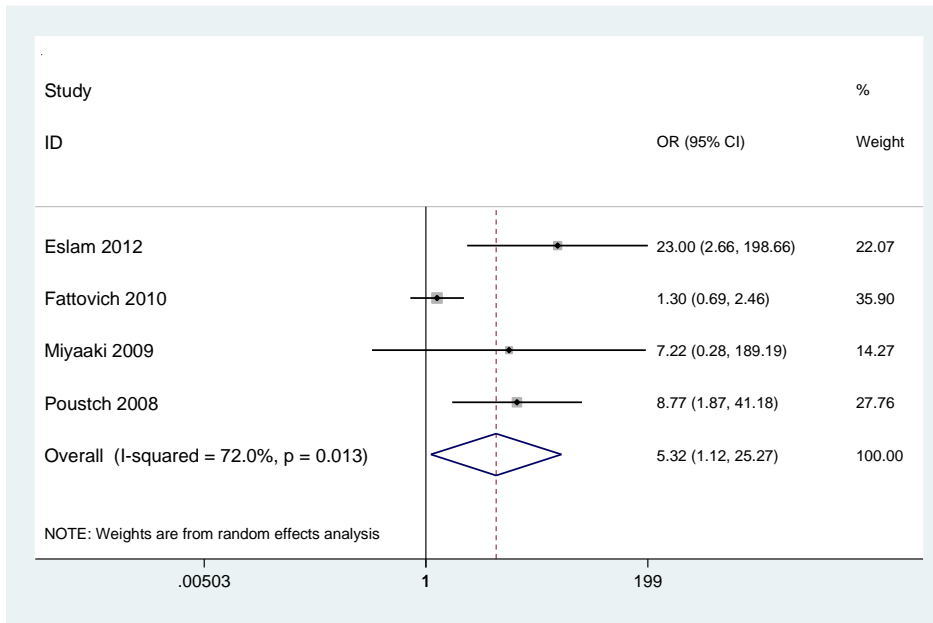

Heterogeneity  $Q=10.73$  (d.f.=3)  $p=0.013$ ;  $I^2=72\%$ ;  $t^2=1.65$ ; Test of  $OR=1$ :  $p=0.036$

FIGURE 7

## **LEGENDS**

**Figure 6. Odds-ratio for the association between IR and SVR in subjects with HCV**

**G1. Study analysis of HOMA-IR index cut-off > 2.**

**Figure 7. Odds-ratio for the association between IR and SVR in subjects with HCV**

**G2/G3. Study analysis of HOMA-IR index cut-off > 2**
